# Supplementary material
Source: Springer Nature journal article supplement (https://www.springermedizin.de/resource/supplementary/12943_2009_548_MOESM9_ESM.pdf/9554946)

# BT474

A

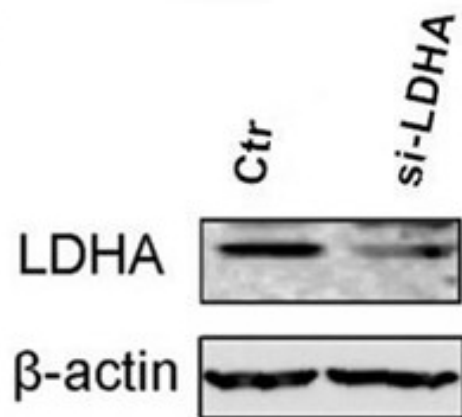

B

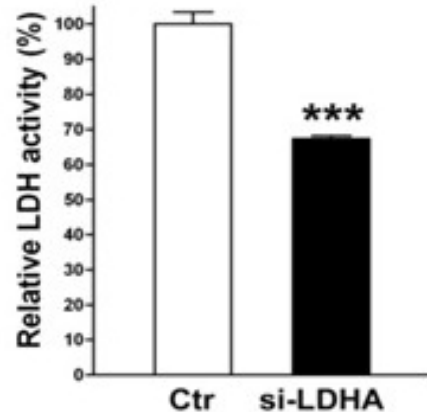

C

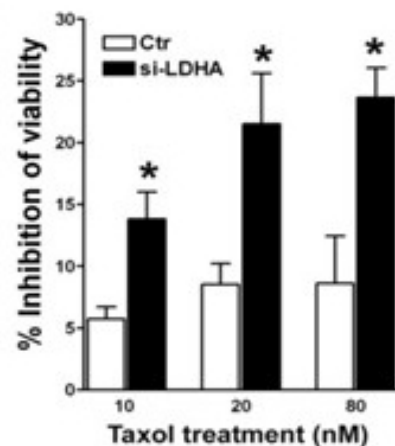

# MDA-MB-231

D

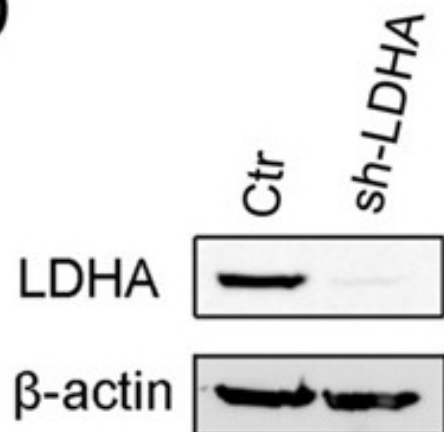

E

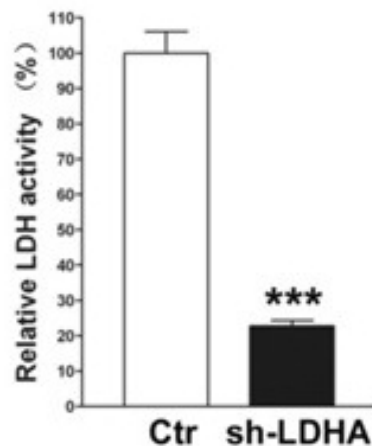

F

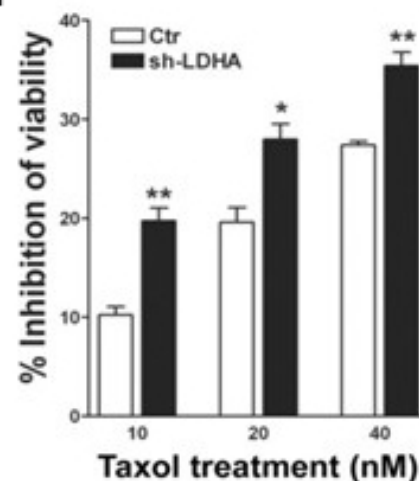

Supplement: MOESM9 [file 9554946]
